# Supplementary material
Source: PubMed Central journal article supplement (PMC4573661)

**A**

*Apc*<sup>Min/+</sup>  
*Klf9*<sup>+/+</sup>

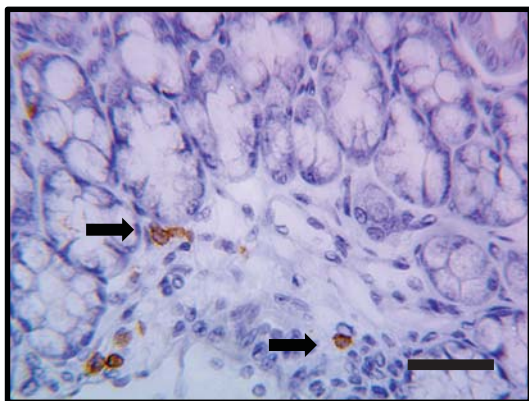

*Apc*<sup>Min/+</sup>  
*Klf9*<sup>+/-</sup>

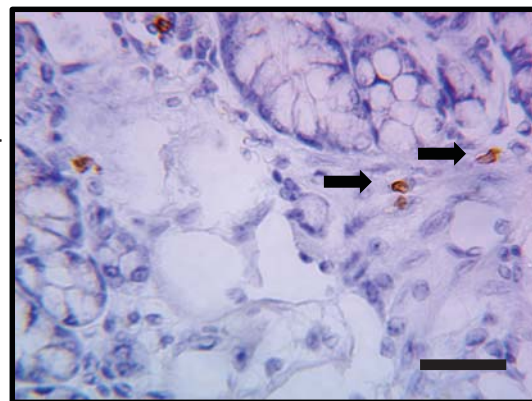

*Apc*<sup>Min/+</sup>  
*Klf9*<sup>-/-</sup>

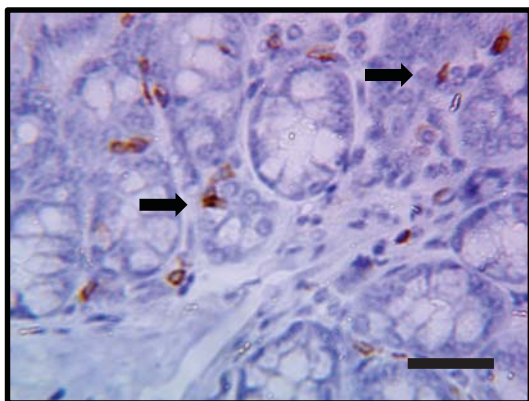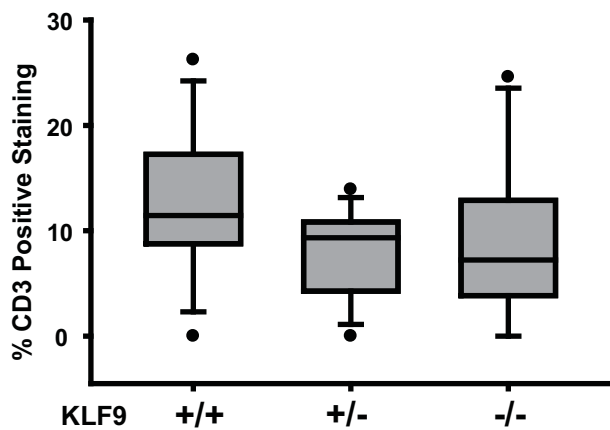**B**

*Apc*<sup>Min/+</sup>  
*Klf9*<sup>+/+</sup>

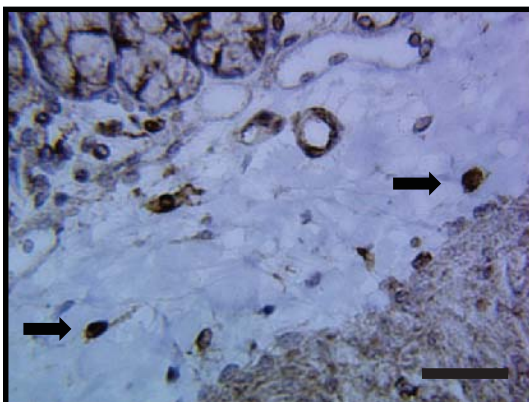

*Apc*<sup>Min/+</sup>  
*Klf9*<sup>+/-</sup>

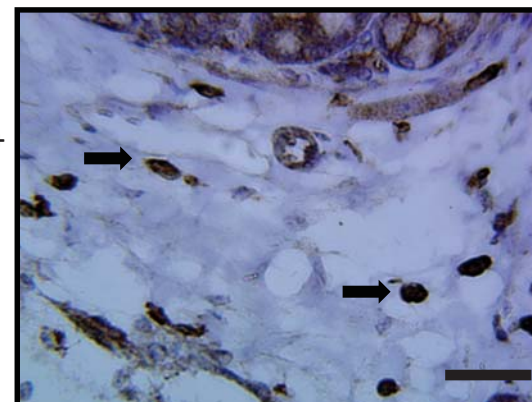

*Apc*<sup>Min/+</sup>  
*Klf9*<sup>-/-</sup>

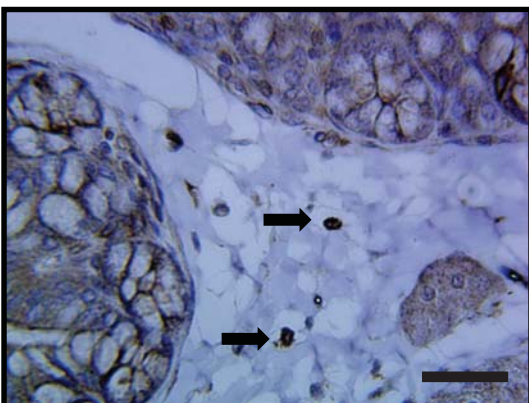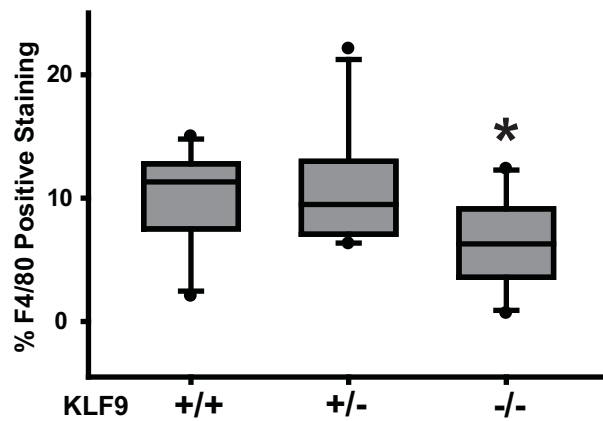

Supplement: supp_bgv104_SFig5.pdf [file supp_bgv104_SFig5.pdf]
