# Supplementary material
Source: PubMed Central journal article supplement (PMC4573661)

**A**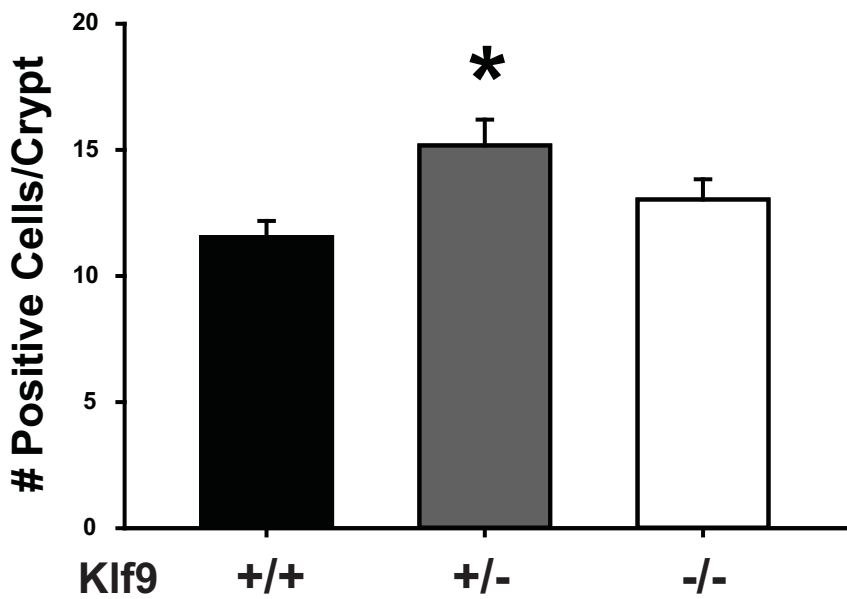**B**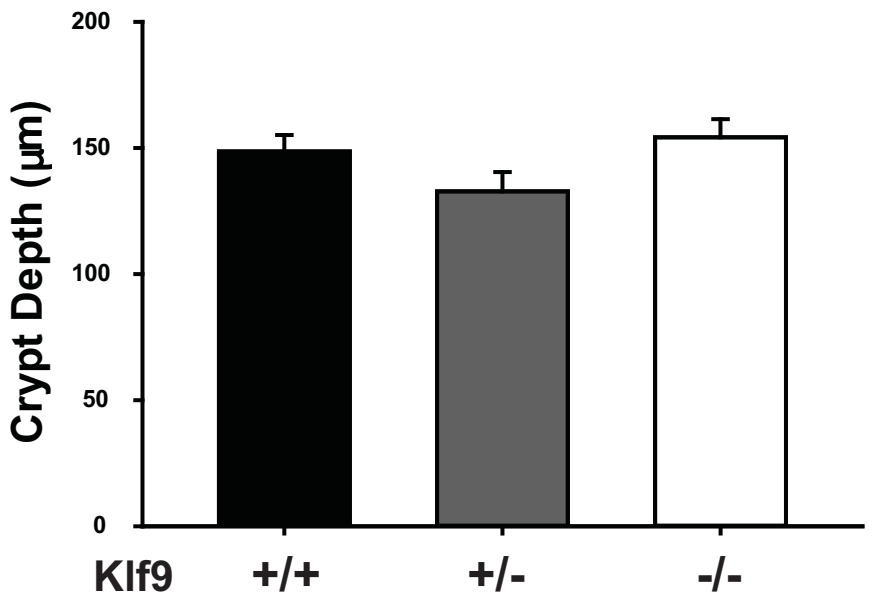

Supplement: supp_bgv104_SFig3.pdf [file supp_bgv104_SFig3.pdf]
